# Supplementary material for: Chemoaffinity-mediated crystallization of Cu2O: a reaction effect on crystal growth and anode property
Source: Royal Society of Chemistry journal article supplement (doi:10.1039/c2ce26500a), 2012-12-11
Supplement: c2ce26500a.pdf [file c2ce26500a.pdf]

# Supporting information

## **Chemoaffinity-mediated crystallization of Cu<sub>2</sub>O: a reaction effect on crystal growth and anode property**

Kunfeng Chen and Dongfeng Xue\*

State Key Laboratory of Rare Earth Resource Utilization, Changchun Institute of Applied Chemistry, Chinese Academy of Sciences, Changchun 130022, China  
School of Chemical Engineering, Dalian University of Technology, Dalian 116024, China

\* Corresponding author. E-mail: dongfeng@ciac.jl.cn

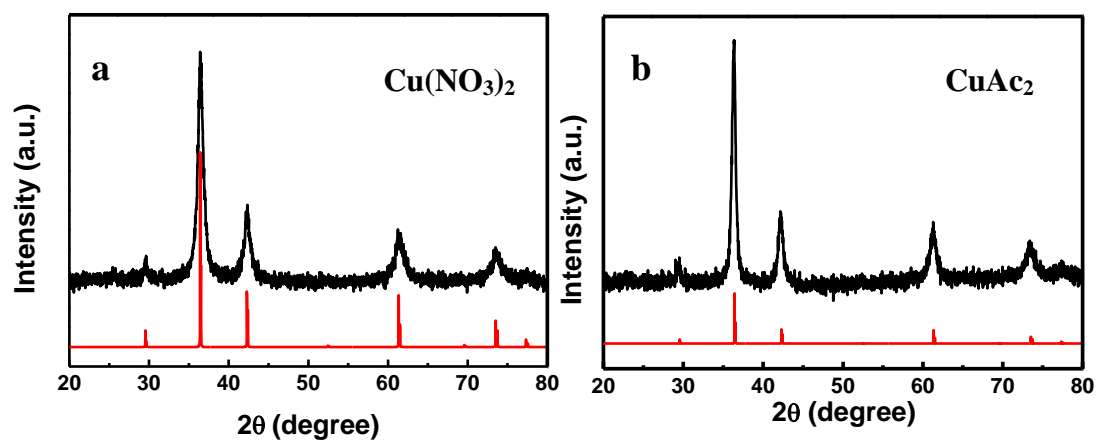

Fig. S1. XRD patterns of final products obtained with Cu(NO<sub>3</sub>)<sub>2</sub> (a) and CuAc<sub>2</sub> (b) as copper salts. JCPDS No. 05-0667.

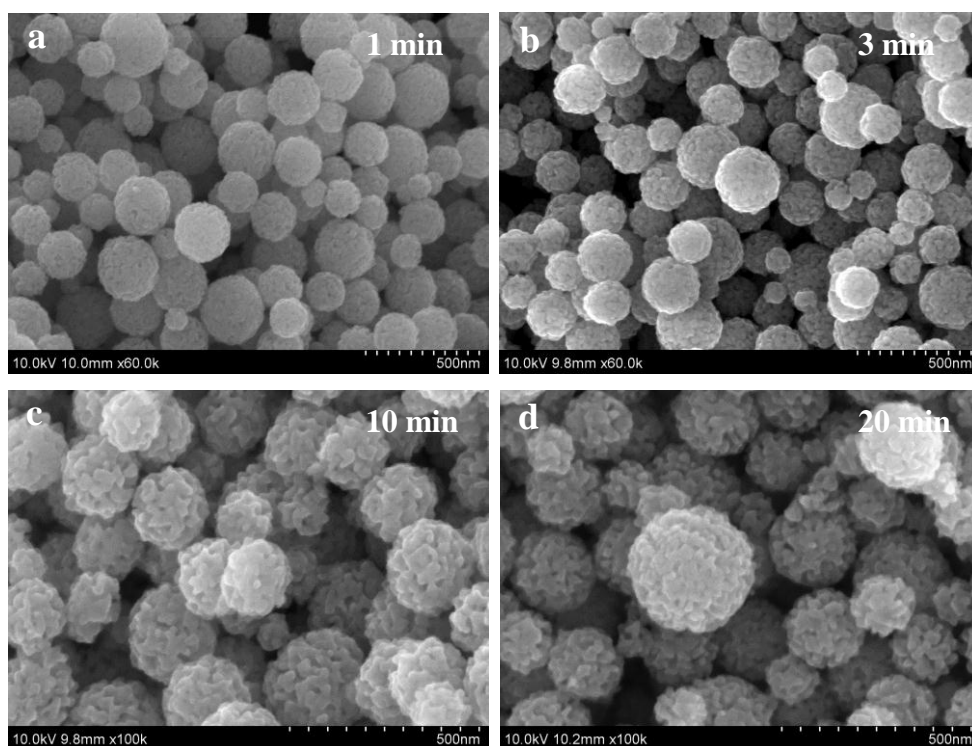

Fig. S2. SEM images of  $\text{Cu}_2\text{O}$  spheres collected at different reaction times with  $\text{Cu}(\text{NO}_3)_2$  as copper precursor.

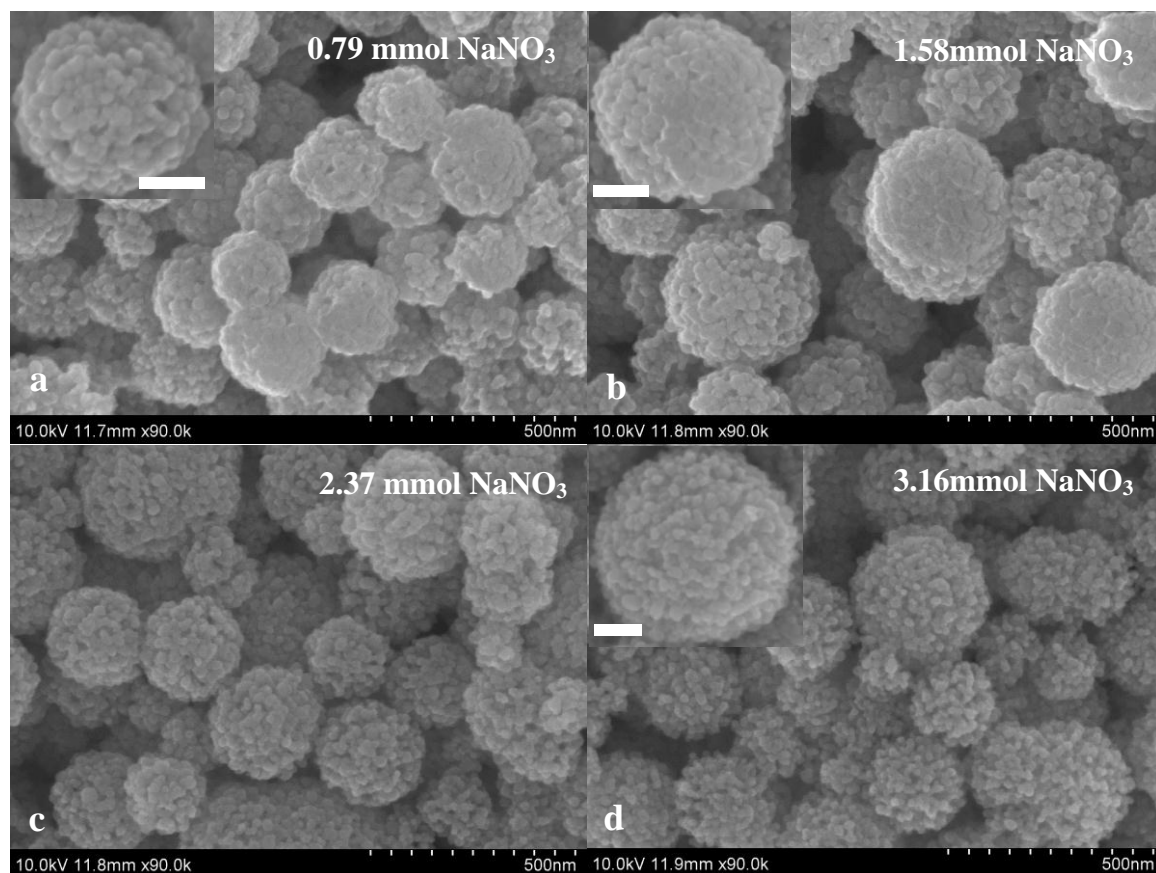

Fig. S3. SEM images of products with  $\text{Cu}(\text{NO}_3)_2$  as precursor and adding different amounts of  $\text{NaNO}_3$ . Scale bars of insets are 100 nm.

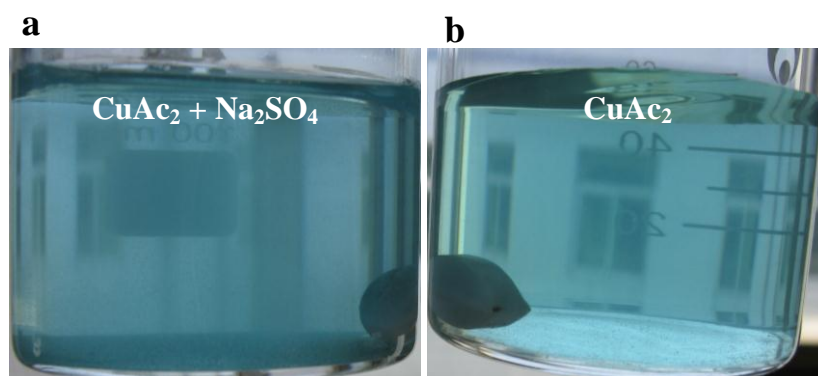

Fig. S4. Photographs showing the cloudy solution formed with the introduction of  $\text{SO}_4^{2-}$ .

Table S1. Discharge capacities of Cu<sub>2</sub>O electrodes

| Sample                            | Discharge capacity / mAh g <sup>-1</sup> |                 |                  |                  |
|-----------------------------------|------------------------------------------|-----------------|------------------|------------------|
|                                   | 1 <sup>st</sup>                          | 2 <sup>nd</sup> | 20 <sup>th</sup> | 50 <sup>th</sup> |
| CuSO <sub>4</sub>                 | 558.5                                    | 346.1           | 78.9             | 41.1             |
| Cu(NO <sub>3</sub> ) <sub>2</sub> | 738.9                                    | 406.5           | 70.9             | 43.1             |
| CuAc <sub>2</sub>                 | 728.3                                    | 534.4           | 74.6             | 32.5             |
| NaOH                              | 475.5                                    | 246             | 141.8            | 87               |
